# Supplementary material
Source: ML conference proceedings conference paper supplement (https://proceedings.neurips.cc/paper_files/paper/2023/hash/971f1e59cd956cc094da4e2f78c6ea7c-Abstract.html)
Supplement: Supplementary file 1 [file 971f1e59cd956cc094da4e2f78c6ea7c-Supplemental-Conference.pdf]

## 1 A Implementation Details

### 2 A.1 Standard self-supervised learning

3 We follow the default settings for standard self-supervised learning algorithms, and present the  
 4 training details in Table 1 and Table 2. We use the linear  $lr$  scaling rule:  $lr = base\_lr \times bsz/256$ .  
 5 For **BYOL** [6], we did not follow the hyperparameters ( $blr = 1.0e-4, wd = 0.03$ ) in [4], as we  
 6 found our setting here yielded better accuracy. For **DINO** [2], we did not use the multi-crop strategy  
 7 and only pre-trained the model with two  $224 \times 224$  crops.

| config                 | MAE                          | SimCLR                       |
|------------------------|------------------------------|------------------------------|
| optimizer              | AdamW                        | AdamW                        |
| base learning rate     | $1.5e-4$                     | $2.0e-4$                     |
| weight decay           | 0.05                         | 0.1                          |
| optimizer momentum     | $\beta_1, \beta_2=0.9, 0.95$ | $\beta_1, \beta_2=0.9, 0.98$ |
| batch size             | 4096                         | 4096                         |
| learning rate schedule | cosine decay                 | cosine decay                 |
| epochs                 | 300 (cc3m) / 80 (cc12m)      | 100 (cc3m) / 35 (cc12m)      |
| warmup epochs          | 10 (cc3m) / 4 (cc12m)        | 5 (cc3m) / 1 (cc12m)         |
| augmentation           | RandomResizedCrop, Flip      | SimCLR Aug. [3]              |

Table 1: **Self-supervised pre-training settings.** MAE and SimCLR.

| config                    | DINO                          | BYOL/MoCo-v3                 |
|---------------------------|-------------------------------|------------------------------|
| optimizer                 | AdamW                         | AdamW                        |
| base learning rate        | $5.0e-4$                      | $1.5e-4$                     |
| weight decay              | 0.04 to 0.4, cosine schedule  | 0.1                          |
| optimizer momentum        | $\beta_1, \beta_2=0.9, 0.999$ | $\beta_1, \beta_2=0.9, 0.95$ |
| batch size                | 4096                          | 4096                         |
| learning rate schedule    | cosine decay                  | cosine decay                 |
| epochs                    | 100 (cc3m) / 35 (cc12m)       | 100 (cc3m) / 35 (cc12m)      |
| warmup epochs             | 5 (cc3m) / 2 (cc12m)          | 5 (cc3m) / 2 (cc12m)         |
| momentum update $\lambda$ | 0.996 to 1, cosine schedule   | 0.996 to 1, cosine schedule  |
| augmentation              | BYOL Aug. [6]                 | BYOL Aug. [6]                |
| teacher temp. $\tau_t$    | 0.04 to 0.07, linear schedule |                              |
| student temp. $\tau_s$    | 0.1                           |                              |

Table 2: **Self-supervised pre-training settings.** DINO, BYOL and MoCo v3.

### 8 A.2 StableRep pre-training

| config                 | StableRep                    |
|------------------------|------------------------------|
| batch size             | 8256 ( $m = 6, n = 1376$ )   |
| optimizer              | AdamW                        |
| base learning rate     | $2.0e-4$                     |
| peak learning rate     | $base\_lr \times bsz/512$    |
| weight decay           | 0.1                          |
| optimizer momentum     | $\beta_1, \beta_2=0.9, 0.98$ |
| learning rate schedule | cosine decay                 |
| epochs                 | 35 / 70 / 105                |
| warmup epochs          | 1.2 / 2.3 / 3.5              |
| augmentation           | SimCLR Aug. [3]              |

Table 3: **StableRep pre-training settings.**

9 The hyperparameters for StableRep is presented in Table 3. Indeed, they are the same as that in  
 10 SimCLR. The difference is that the *base\_lr* in StableRep is for 512 images while in SimCLR it is for  
 11 256 images, because each image in StableRep only has one single crop. We ended up using a batch  
 12 size of 8256 images, since we trained our model with 32 GPUs and 8192 is not divisible over  $32 \times 6$ .  
 13 The computation for StableRep has been converted to SimCLR-equivalent epochs.

### 14 A.3 CLIP training

15 We follow the hyperparameter setting used in [7] since it is better than that from the original CLIP [8]  
 16 paper. Table 4 summarizes the training details, and Table 5 presents the architecture of CLIP encoders.  
 17 With this training setup, we are able to produce 40.2% ImageNet zero-shot accuracy when training  
 18 CLIP on CC12M dataset. As a comparison, [7] reports 36.0% using the same architecture.

| config                 | CLIP                                |
|------------------------|-------------------------------------|
| batch size             | 8192                                |
| optimizer              | AdamW                               |
| peak learning rate     | 1e-3                                |
| weight decay           | 0.5                                 |
| optimizer momentum     | $\beta_1, \beta_2=0.9, 0.98$        |
| learning rate schedule | cosine decay                        |
| epochs                 | 35                                  |
| warmup epochs          | 1                                   |
| augmentation           | RandomResizedCrop(scale=(0.5, 1.0)) |

Table 4: CLIP training settings.

| Model    | Patch size | Input resolution | Embedding dimension | Vision Transformer |       |       | Text Transformer |       |       | Vocab size | Text length |
|----------|------------|------------------|---------------------|--------------------|-------|-------|------------------|-------|-------|------------|-------------|
|          |            |                  |                     | Layers             | Width | Heads | Layers           | Width | Heads |            |             |
| ViT-B/16 | 16         | 224              | 512                 | 12                 | 768   | 12    | 12               | 512   | 8     | 49,408     | 77          |

Table 5: CLIP encoder details.

### 19 A.4 ImageNet linear probing

20 We follow prior work [4, 2] to train the linear classifier. It has been generally observed that regular-  
 21 ization such as weight decay hurts the performance [11]. Following [11, 4], we set weight decay as 0,  
 22 and only use `RandomResizedCrop` and `RandomHorizontalFlip` as data augmentation. We  
 23 sweep the *base\_lr* over  $\{0.2, 0.5, 1, 1.5, 2, 3, 5, 10\} \times 10^{-2}$ .

| config                 | value                   |
|------------------------|-------------------------|
| batch size             | 1024                    |
| optimizer              | SGD                     |
| base learning rate     | sweep                   |
| weight decay           | 0                       |
| optimizer momentum     | 0.9                     |
| learning rate schedule | cosine decay            |
| epochs                 | 90                      |
| augmentation           | RandomResizedCrop, Flip |

Table 6: ImageNet linear probing settings.

### 24 A.5 Fine-grained linear classification

25 Following [3, 6, 5], we fit a regularized multinomial logistic regression model on top of the frozen  
 26 CLS token. In training and testing, we do not perform any data augmentation; images are resized to  
 27 224 pixels along the shorter side using bicubic resampling, followed by a center crop of  $224 \times 224$ .

28 We minimize the cross-entropy objective using L-BFGS with  $\ell_2$ -regularization. We select this  $\ell_2$ -  
 29 regularization constant on the validation set over 45 logarithmically spaced values between  $10^{-6}$  and  
 30  $10^5$ . The maximum number of L-BFGS iterations is set to 500.

### 31 A.6 Few-shot image classification

32 Following the settings in [5, 1], we evaluate the 5-way 5-shot performance on 10 different datasets.  
 33 We do not use data augmentation; images are resized to 224 pixels along the shorter side using  
 34 bicubic resampling, followed by a center crop of  $224 \times 224$ . We report the mean accuracy of 600  
 35 randomly sampled tasks (also known as episodes). For each task, images are randomly sampled from  
 36 the combination of training, validation and testing sets. We sample 15 query images for each class in  
 37 every task for evaluation purpose.

## 38 B Additional Results

### 39 B.1 Fine-grained classification

40 In Table 7, we further present the fine-grained linear classification results by models from RedCaps or  
 41 models that are trained longer (2x or 3x longer). When pre-training on RedCaps, StableRep achieves  
 42 the best average accuracy. Longer training of StableRep further improves transferability.

|         |            | CIFAR-10                      | CIFAR-100   | Aircraft    | Cats        | DTD         | Flowers     | Pets | SUN397      | Caltech-101 | Food-101    | VOC2007     | Average     |
|---------|------------|-------------------------------|-------------|-------------|-------------|-------------|-------------|------|-------------|-------------|-------------|-------------|-------------|
|         |            | Pre-training on Redcaps       |             |             |             |             |             |      |             |             |             |             |             |
| Real    | SimCLR     | 90.2                          | 72.0        | 46.8        | 42.8        | 77.9        | 94.6        | 83.0 | 61.2        | 82.7        | 81.3        | 80.9        | 73.9        |
|         | CLIP       | <b>94.2</b>                   | <b>78.9</b> | 52.9        | 74.9        | 73.9        | 97.8        | 91.6 | 66.2        | <b>91.6</b> | <b>89.2</b> | 85.4        | 81.5        |
| Syn     | SimCLR     | 85.1                          | 65.4        | 48.7        | 53.7        | 74.6        | 95.0        | 79.6 | 61.8        | 84.5        | 79.7        | 80.4        | 73.5        |
|         | CLIP       | 88.7                          | 71.4        | 53.7        | 77.3        | 76.0        | 96.9        | 88.2 | 67.3        | 90.3        | 83.7        | 84.5        | 79.8        |
|         | StableRep  | 90.4                          | 73.8        | <b>57.5</b> | <b>81.1</b> | <b>79.5</b> | <b>98.4</b> | 90.8 | <b>71.1</b> | <b>95.1</b> | 88.2        | <b>86.7</b> | <b>83.0</b> |
|         |            | Longer training for StableRep |             |             |             |             |             |      |             |             |             |             |             |
| cc12m   | 35 epochs  | 90.7                          | 74.4        | 57.6        | 80.3        | 79.0        | 96.7        | 87.1 | 73.2        | 94.0        | 83.5        | 87.2        | 82.2        |
|         | 70 epochs  | 91.5                          | 74.7        | 59.1        | 82.5        | 79.7        | 97.5        | 88.1 | 74.3        | 94.3        | 85.0        | 87.8        | 83.1        |
|         | 105 epochs | 91.5                          | 75.9        | 58.8        | 84.2        | 80.1        | 97.6        | 87.9 | 74.7        | 94.5        | 85.4        | 87.8        | <b>83.5</b> |
| redcaps | 35 epochs  | 90.4                          | 73.8        | 57.5        | 81.1        | 79.5        | 98.4        | 90.8 | 71.1        | 95.1        | 88.2        | 86.7        | 83.0        |
|         | 70 epochs  | 91.0                          | 75.4        | 58.0        | 83.3        | 79.8        | 98.5        | 90.7 | 72.9        | 95.2        | 89.3        | 87.5        | 83.8        |
|         | 105 epochs | 91.3                          | 75.0        | 59.6        | 82.8        | 80.7        | 98.6        | 91.0 | 72.8        | 94.7        | 89.2        | 87.6        | <b>83.9</b> |

Table 7: Linear transfer results on fine-grained datasets. **Upper:** different methods pre-trained on RedCaps. **Lower:** StableRep with different training schedules on CC12M and RedCaps. Longer training improves transferability.

### 43 B.2 Few-shot image classification

44 We further summarizes the few-shot image classification results in Table 8. The 95% confidence  
 45 interval is provided. StableRep stands out on the majority of the evaluated datasets.

## 46 C Image Generation

### 47 C.1 Implementation details

48 We use Stable Diffusion [9] v1.5. During sampling, we generate images by 50 DDIM [10] steps. To  
 49 accelerate the generation process, we leverage xFormers library for efficient attention computation,  
 50 which brings down the sampling time to  $\sim 0.8s$  per image on a single A100 GPU and  $\sim 2.3s$  per image

|                         |           | CIFAR-10        | CIFAR-100       | Aircraft        | Cats            | DTD             | Flowers         | Pets            | SUN397          | Caltech-101     | Food-101        | Average     |
|-------------------------|-----------|-----------------|-----------------|-----------------|-----------------|-----------------|-----------------|-----------------|-----------------|-----------------|-----------------|-------------|
| Pre-training on cc12m   |           |                 |                 |                 |                 |                 |                 |                 |                 |                 |                 |             |
| Real                    | SimCLR    | 64.0±0.7        | 70.4±0.8        | 40.7±0.9        | 50.9±0.8        | 82.2±0.6        | 92.1±0.5        | 74.4±0.8        | 94.0±0.4        | 90.4±0.5        | 70.4±0.7        | 73.0        |
|                         | CLIP      | <b>77.5±0.6</b> | <b>82.1±0.7</b> | 62.0±1.0        | 90.9±0.5        | 83.3±0.6        | 97.6±0.2        | 91.1±0.5        | 97.2±0.2        | 98.2±0.2        | 87.0±0.5        | 86.7        |
| Syn                     | SimCLR    | 50.0±0.6        | 58.9±0.8        | 45.2±1.0        | 54.2±0.8        | 79.8±0.6        | 92.0±0.5        | 74.6±0.8        | 92.9±0.4        | 89.1±0.6        | 71.0±0.7        | 70.8        |
|                         | CLIP      | 63.1±0.6        | 73.5±0.7        | 61.3±1.0        | <b>92.5±0.4</b> | 81.7±0.6        | 96.9±0.3        | 91.5±0.5        | 96.7±0.2        | 96.8±0.3        | 82.5±0.6        | 83.7        |
|                         | StableRep | 68.2±0.6        | 75.9±0.8        | <b>62.5±1.0</b> | 92.0±0.5        | <b>86.3±0.5</b> | <b>98.2±0.2</b> | <b>92.4±0.5</b> | <b>97.3±0.2</b> | <b>98.7±0.2</b> | <b>87.6±0.5</b> | <b>85.9</b> |
| Pre-training on redcaps |           |                 |                 |                 |                 |                 |                 |                 |                 |                 |                 |             |
| Real                    | SimCLR    | 62.3±0.6        | 69.4±0.7        | 39.6±0.9        | 51.0±0.8        | 82.7±0.6        | 94.8±0.4        | 85.4±0.6        | 91.8±0.5        | 88.5±0.6        | 79.1±0.7        | 74.5        |
|                         | CLIP      | <b>80.6±0.5</b> | <b>85.3±0.6</b> | 54.5±0.9        | 88.5±0.6        | 82.6±0.6        | 99.0±0.1        | <b>94.5±0.4</b> | 95.9±0.3        | 97.8±0.2        | <b>94.4±0.3</b> | 87.3        |
| Syn                     | SimCLR    | 52.9±0.6        | 60.8±0.8        | 40.9±0.9        | 53.2±0.8        | 79.5±0.6        | 94.3±0.4        | 78.3±0.7        | 92.0±0.4        | 88.9±0.5        | 75.9±0.7        | 71.7        |
|                         | CLIP      | 65.7±0.6        | 75.7±0.7        | 55.2±1.0        | <b>90.1±0.5</b> | 82.6±0.6        | 98.2±0.2        | 92.0±0.5        | 96.3±0.3        | 96.9±0.3        | 88.1±0.5        | 84.1        |
|                         | StableRep | 68.0±0.6        | 76.7±0.8        | <b>57.1±1.0</b> | <b>90.1±0.5</b> | <b>86.5±0.5</b> | <b>99.2±0.1</b> | 94.4±0.4        | <b>96.9±0.3</b> | <b>98.9±0.2</b> | 92.1±0.4        | 86.0        |

Table 8: Few-shot image classification. **Upper:** pre-training on CC12M dataset. **Upper:** pre-training on RedCaps dataset.

51 on a V100 GPU. We use 512 V100 GPUs to synthesize images in large scale, which takes  $\sim 13$  hours  
 52 for every ten million images.

53 **Image resolution.** The image resolution may affect the quality of representations learned by self-  
 54 supervised learning algorithms. We try to make a relative fair comparison by storing all synthetic and  
 55 real images in similar resolutions. The synthetic images generated by Stable Diffusion are  $512 \times 512$ ;  
 56 we resized them to  $256 \times 256$  before storing them on the disk. The real images have various sizes,  
 57 ranging from less than a hundred of pixels in shorter side to thousands of pixels; we resize the shorter  
 58 side of all real images to 256.

## 59 C.2 Generation Examples

60 Some examples of synthetic images are visualized in Figure 1.

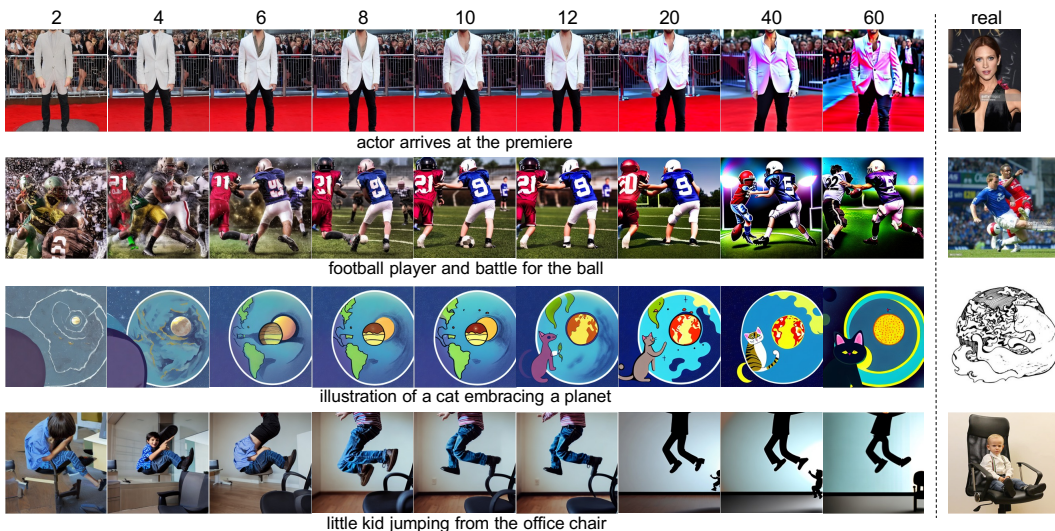

Figure 1: **Examples of synthetic images.** We show examples for 4 different text prompts. For each prompt, we provide examples synthesized with different guidance scale  $w$ , as well as the original real image.

## 61 **D Further Discussion**

62 **Broader impacts.** This paper is on the basics of visual representation learning, and we believe it  
63 will be beneficial to the practice of this field. An immediate application of our method is to reduce  
64 the reliance on collecting large scale real images for learning representations. This may have the  
65 beneficial effects of being more cost effective and reducing biases introduced by human collection  
66 and curation processes. At the same time, our method relies on pre-trained text-to-image generative  
67 models that are trained on large scale uncured web-scale data, and such data may hide social biases  
68 and errors that would have been uncovered via the human curation process. We also note that the text  
69 prompts we used are not bias free: what prompts we choose determine what images are synthesized.  
70 The choice of prompts therefore plays a similar role to the choice of what real images to collect for  
71 self-supervised visual representation learning.

72 **Compute.** Each of our StableRep models is trained on 4 nodes, each of which has 8 A100 GPUs  
73 and 96 CPU cores. We store all synthetic images inside two NFS folders, each with 100 TBs. It  
74 takes ~20 hours to complete 35 SimCLR-equivalent epochs of training on CC12M and ~23 hours  
75 on RedCaps.

## 76 **References**

- 77 [1] Mohamed El Banani, Karan Desai, and Justin Johnson. Learning visual representations via  
78 language-guided sampling. *arXiv preprint arXiv:2302.12248*, 2023. 3
- 79 [2] Mathilde Caron, Hugo Touvron, Ishan Misra, Hervé Jégou, Julien Mairal, Piotr Bojanowski,  
80 and Armand Joulin. Emerging properties in self-supervised vision transformers. In *ICCV*, 2021.  
81 1, 2
- 82 [3] Ting Chen, Simon Kornblith, Mohammad Norouzi, and Geoffrey Hinton. A simple framework  
83 for contrastive learning of visual representations. *arXiv:2002.05709*, 2020. 1, 2
- 84 [4] Xinlei Chen, Saining Xie, and Kaiming He. An empirical study of training self-supervised  
85 vision transformers. In *ICCV*, 2021. 1, 2
- 86 [5] Linus Ericsson, Henry Gouk, and Timothy M Hospedales. How well do self-supervised models  
87 transfer? In *CVPR*, 2021. 2, 3
- 88 [6] Jean-Bastien Grill, Florian Strub, Florent Alché, Corentin Tallec, Pierre Richemond, Elena  
89 Buchatskaya, Carl Doersch, Bernardo Avila Pires, Zhaohan Guo, Mohammad Gheshlaghi Azar,  
90 et al. Bootstrap your own latent—a new approach to self-supervised learning. *Advances in neural  
91 information processing systems*, 2020. 1, 2
- 92 [7] Norman Mu, Alexander Kirillov, David Wagner, and Saining Xie. Slip: Self-supervision meets  
93 language-image pre-training. In *ECCV*, 2022. 2
- 94 [8] Alec Radford, Jong Wook Kim, Chris Hallacy, Aditya Ramesh, Gabriel Goh, Sandhini Agarwal,  
95 Girish Sastry, Amanda Askell, Pamela Mishkin, Jack Clark, et al. Learning transferable visual  
96 models from natural language supervision. In *International conference on machine learning*,  
97 pages 8748–8763. PMLR, 2021. 2
- 98 [9] Robin Rombach, Andreas Blattmann, Dominik Lorenz, Patrick Esser, and Björn Ommer.  
99 High-resolution image synthesis with latent diffusion models. In *CVPR*, 2022. 3
- 100 [10] Jiaming Song, Chenlin Meng, and Stefano Ermon. Denoising diffusion implicit models. *arXiv  
101 preprint arXiv:2010.02502*, 2020. 3
- 102 [11] Yonglong Tian, Dilip Krishnan, and Phillip Isola. Contrastive multiview coding.  
103 *arXiv:1906.05849*, 2019. 2
